# Supplementary material for: Evaluation of the Liver Disease Information in Baidu Encyclopedia and Wikipedia: Longitudinal Study
Source: PubMed Central journal article supplement (PMC7850904; doi:10.2196/17680), 2021-01-18
Supplement: jmir_v23i1e17680_app1.pdf [file jmir_v23i1e17680_app1.pdf]

| ICD-10                                                       | Search Terms<br>in Chinese | URL                                                                                                                                                                                                     | DISCERN score |          |          |                |
|--------------------------------------------------------------|----------------------------|---------------------------------------------------------------------------------------------------------------------------------------------------------------------------------------------------------|---------------|----------|----------|----------------|
|                                                              |                            |                                                                                                                                                                                                         | Section1      | Section2 | Section3 | Total<br>Score |
| K70.0 Alcoholic fatty liver                                  | 酒精性脂肪肝                     | <a href="https://baike.baidu.com/item/%E9%85%92%E7%B2%BE%E6%80%A7%E8%84%82%E8%82%AA%E8%82%9D">https://baike.baidu.com/item/%E9%85%92%E7%B2%BE%E6%80%A7%E8%84%82%E8%82%AA%E8%82%9D</a>                   | 24            | 17       | 3        | 44             |
| K70.1 Alcoholic hepatitis                                    | 酒精性肝炎                      | <a href="https://baike.baidu.com/item/%E9%85%92%E7%B2%BE%E6%80%A7%E8%82%9D%E7%82%8E">https://baike.baidu.com/item/%E9%85%92%E7%B2%BE%E6%80%A7%E8%82%9D%E7%82%8E</a>                                     | 20            | 18       | 3        | 41             |
| K70.3 Alcoholic cirrhosis of liver                           | 酒精性肝硬化                     | <a href="https://baike.baidu.com/item/%E9%85%92%E7%B2%BE%E6%80%A7%E8%82%9D%E7%A1%AC%E5%8C%96">https://baike.baidu.com/item/%E9%85%92%E7%B2%BE%E6%80%A7%E8%82%9D%E7%A1%AC%E5%8C%96</a>                   | 19            | 10       | 2        | 31             |
| K70.9 Alcoholic liver disease, unspecified                   | 酒精性肝病                      | <a href="https://baike.baidu.com/item/%E9%85%92%E7%B2%BE%E6%80%A7%E8%82%9D%E7%97%85">https://baike.baidu.com/item/%E9%85%92%E7%B2%BE%E6%80%A7%E8%82%9D%E7%97%85</a>                                     | 26            | 14       | 3        | 43             |
| K71.9 Toxic liver disease, unspecified                       | 中毒性肝病                      | <a href="https://baike.baidu.com/item/%E4%B8%AD%E6%AF%92%E6%80%A7%E8%82%9D%E7%97%85">https://baike.baidu.com/item/%E4%B8%AD%E6%AF%92%E6%80%A7%E8%82%9D%E7%97%85</a>                                     | 10            | 7        | 1        | 18             |
| K72.1 Chronic hepatic failure                                | 慢性肝衰竭                      | <a href="https://baike.baidu.com/item/%E6%85%A2%E6%80%A7%E8%82%9D%E8%A1%B0%E7%AB%AD">https://baike.baidu.com/item/%E6%85%A2%E6%80%A7%E8%82%9D%E8%A1%B0%E7%AB%AD</a>                                     | 20            | 9        | 2        | 31             |
| K72.9 Hepatic failure, unspecified                           | 肝衰竭                        | <a href="https://baike.baidu.com/item/%E8%82%9D%E8%A1%B0%E7%AB%AD">https://baike.baidu.com/item/%E8%82%9D%E8%A1%B0%E7%AB%AD</a>                                                                         | 25            | 22       | 3        | 50             |
| K73.0 Chronic persistent hepatitis, not elsewhere classified | 慢性持续性肝炎                    | <a href="https://baike.baidu.com/item/%E6%85%A2%E6%80%A7%E6%8C%81%E7%BB%AD%E6%80%A7%E8%82%9D%E7%82%8E">https://baike.baidu.com/item/%E6%85%A2%E6%80%A7%E6%8C%81%E7%BB%AD%E6%80%A7%E8%82%9D%E7%82%8E</a> | 16            | 11       | 1        | 28             |
| K73.2 Chronic active hepatitis, not elsewhere classified     | 慢性活动性肝炎                    | <a href="https://baike.baidu.com/item/%E6%85%A2%E6%80%A7%E6%B4%BB%E5%8A%A8%E6%80%A7%E8%82%9D%E7%82%8E">https://baike.baidu.com/item/%E6%85%A2%E6%80%A7%E6%B4%BB%E5%8A%A8%E6%80%A7%E8%82%9D%E7%82%8E</a> | 9             | 7        | 1        | 17             |

|                                                         |           |                                                                                                                                                                                                                                             |    |    |   |    |
|---------------------------------------------------------|-----------|---------------------------------------------------------------------------------------------------------------------------------------------------------------------------------------------------------------------------------------------|----|----|---|----|
| K73.9 Chronic hepatitis, unspecified                    | 慢性肝炎      | <a href="https://baike.baidu.com/item/%E6%85%A2%E6%80%A7%E8%82%9D%E7%82%8E">https://baike.baidu.com/item/%E6%85%A2%E6%80%A7%E8%82%9D%E7%82%8E</a>                                                                                           | 23 | 20 | 4 | 47 |
| K74.0 Hepatic fibrosis                                  | 肝纤维化      | <a href="https://baike.baidu.com/item/%E8%82%9D%E7%BA%A4%E7%BB%B4%E5%8C%96">https://baike.baidu.com/item/%E8%82%9D%E7%BA%A4%E7%BB%B4%E5%8C%96</a>                                                                                           | 22 | 11 | 2 | 35 |
| K74.1 Hepatic sclerosis                                 | 肝硬化       | <a href="https://baike.baidu.com/item/%E8%82%9D%E7%A1%AC%E5%8C%96">https://baike.baidu.com/item/%E8%82%9D%E7%A1%AC%E5%8C%96</a>                                                                                                             | 26 | 20 | 4 | 50 |
| K74.3 Primary biliary cirrhosis                         | 原发性胆汁性肝硬化 | <a href="https://baike.baidu.com/item/%E5%8E%9F%E5%8F%91%E6%80%A7%E8%83%86%E6%B1%81%E6%80%A7%E8%82%9D%E7%A1%AC%E5%8C%96">https://baike.baidu.com/item/%E5%8E%9F%E5%8F%91%E6%80%A7%E8%83%86%E6%B1%81%E6%80%A7%E8%82%9D%E7%A1%AC%E5%8C%96</a> | 16 | 12 | 1 | 29 |
| K74.4 Secondary biliary cirrhosis                       | 继发性胆汁性肝硬化 | <a href="https://baike.baidu.com/item/%E7%BB%A7%E5%8F%91%E6%80%A7%E8%83%86%E6%B1%81%E6%80%A7%E8%82%9D%E7%A1%AC%E5%8C%96">https://baike.baidu.com/item/%E7%BB%A7%E5%8F%91%E6%80%A7%E8%83%86%E6%B1%81%E6%80%A7%E8%82%9D%E7%A1%AC%E5%8C%96</a> | 17 | 11 | 2 | 30 |
| K74.5 Biliary cirrhosis, unspecified                    | 胆汁性肝硬化    | <a href="https://baike.baidu.com/item/%E8%83%86%E6%B1%81%E6%80%A7%E8%82%9D%E7%A1%AC%E5%8C%96">https://baike.baidu.com/item/%E8%83%86%E6%B1%81%E6%80%A7%E8%82%9D%E7%A1%AC%E5%8C%96</a>                                                       | 19 | 20 | 3 | 42 |
| K75.0 Abscess of liver                                  | 肝脓肿       | <a href="https://baike.baidu.com/item/%E8%82%9D%E8%84%93%E8%82%BF">https://baike.baidu.com/item/%E8%82%9D%E8%84%93%E8%82%BF</a>                                                                                                             | 18 | 14 | 2 | 34 |
| K75.3 Granulomatous hepatitis, not elsewhere classified | 肉芽肿性肝病    | <a href="https://baike.baidu.com/item/%E8%82%89%E8%8A%BD%E8%82%BF%E6%80%A7%E8%82%9D%E7%97%85/1619029">https://baike.baidu.com/item/%E8%82%89%E8%8A%BD%E8%82%BF%E6%80%A7%E8%82%9D%E7%97%85/1619029</a>                                       | 17 | 7  | 1 | 25 |
| K75.4 Autoimmune hepatitis                              | 自身免疫性肝炎   | <a href="https://baike.baidu.com/item/%E8%87%AA%E8%BA%AB%E5%85%8D%E7%96%AB%E6%80%A7%E8%82%9D%E7%82%8E">https://baike.baidu.com/item/%E8%87%AA%E8%BA%AB%E5%85%8D%E7%96%AB%E6%80%A7%E8%82%9D%E7%82%8E</a>                                     | 24 | 21 | 4 | 49 |
| K76.0 Fatty (change of) liver, not elsewhere classified | 肝脂肪变性     | <a href="https://baike.baidu.com/item/%E8%82%9D%E8%84%82%E8%82%AA%E5%8F%98%E6%80%A7/10968800">https://baike.baidu.com/item/%E8%82%9D%E8%84%82%E8%82%AA%E5%8F%98%E6%80%A7/10968800</a>                                                       | 11 | 7  | 1 | 19 |

|                                      |        |                                                                                                                                                                                                         |    |    |   |    |
|--------------------------------------|--------|---------------------------------------------------------------------------------------------------------------------------------------------------------------------------------------------------------|----|----|---|----|
| K76.3 Infarction of liver            | 肝梗死    | <a href="https://baike.baidu.com/item/%E8%82%9D%E6%A2%97%E6%AD%BB">https://baike.baidu.com/item/%E8%82%9D%E6%A2%97%E6%AD%BB</a>                                                                         | 17 | 9  | 2 | 28 |
| K76.4 Peliosis hepatis               | 肝紫癜病   | <a href="https://baike.baidu.com/item/%E8%82%9D%E7%B4%AB%E7%99%9C%E7%97%85/2523336">https://baike.baidu.com/item/%E8%82%9D%E7%B4%AB%E7%99%9C%E7%97%85/2523336</a>                                       | 18 | 10 | 3 | 31 |
| K76.5 Hepatic veno-occlusive disease | 肝静脉闭塞病 | <a href="https://baike.baidu.com/item/%E8%82%9D%E9%9D%99%E8%84%89%E9%97%AD%E5%A1%9E%E7%97%85/14738785">https://baike.baidu.com/item/%E8%82%9D%E9%9D%99%E8%84%89%E9%97%AD%E5%A1%9E%E7%97%85/14738785</a> | 20 | 14 | 3 | 37 |
| K76.6 Portal hypertension            | 门静脉高压症 | <a href="https://baike.baidu.com/item/%E9%97%A8%E9%9D%99%E8%84%89%E9%AB%98%E5%8E%8B%E7%97%">https://baike.baidu.com/item/%E9%97%A8%E9%9D%99%E8%84%89%E9%AB%98%E5%8E%8B%E7%97%</a>                       | 17 | 19 | 3 | 39 |
| K76.7 Hepatorenal syndrome           | 肝肾综合征  | <a href="https://baike.baidu.com/item/%E8%82%9D%E8%82%BE%E7%BB%BC%E5%90%88%E5%BE%81">https://baike.baidu.com/item/%E8%82%9D%E8%82%BE%E7%BB%BC%E5%90%88%E5%BE%81</a>                                     | 20 | 17 | 3 | 40 |
| K76.9 Liver disease, unspecified     | 肝脏疾病   | <a href="https://baike.baidu.com/item/%E8%82%9D%E8%84%8F%E7%96%BE%E7%97%85">https://baike.baidu.com/item/%E8%82%9D%E8%84%8F%E7%96%BE%E7%97%85</a>                                                       | 21 | 7  | 2 | 30 |
