# Supplementary material for: Evaluation of the Liver Disease Information in Baidu Encyclopedia and Wikipedia: Longitudinal Study
Source: PubMed Central journal article supplement (PMC7850904; doi:10.2196/17680), 2021-01-18
Supplement: jmir_v23i1e17680_app2.pdf [file jmir_v23i1e17680_app2.pdf]

| ICD-10                                                  | Search Terms                   | URL                                                                                                                                     | DISCERN score |          |          |             |
|---------------------------------------------------------|--------------------------------|-----------------------------------------------------------------------------------------------------------------------------------------|---------------|----------|----------|-------------|
|                                                         |                                |                                                                                                                                         | Section1      | Section2 | Section3 | Total Score |
| K70.1 Alcoholic hepatitis                               | Alcoholic hepatitis            | <a href="https://en.wikipedia.org/wiki/Alcoholic_hepatitis">https://en.wikipedia.org/wiki/Alcoholic_hepatitis</a>                       | 30            | 19       | 4        | 53          |
| K70.3 Alcoholic cirrhosis of liver                      | Cirrhosis                      | <a href="https://en.wikipedia.org/wiki/Cirrhosis">https://en.wikipedia.org/wiki/Cirrhosis</a>                                           | 31            | 25       | 4        | 60          |
| K70.9 Alcoholic liver disease, unspecified              | Alcoholic liver disease        | <a href="https://en.wikipedia.org/wiki/Alcoholic_liver_disease">https://en.wikipedia.org/wiki/Alcoholic_liver_disease</a>               | 29            | 21       | 3        | 53          |
| K71.9 Toxic liver disease, unspecified                  | Hepatotoxicity                 | <a href="https://en.wikipedia.org/wiki/Hepatotoxicity">https://en.wikipedia.org/wiki/Hepatotoxicity</a>                                 | 31            | 12       | 3        | 46          |
| K72.9 Hepatic failure, unspecified                      | Liver failure                  | <a href="https://en.wikipedia.org/wiki/Liver_failure">https://en.wikipedia.org/wiki/Liver_failure</a>                                   | 22            | 7        | 2        | 31          |
| K73.9 Chronic hepatitis, unspecified                    | Hepatitis                      | <a href="https://en.wikipedia.org/wiki/Hepatitis#Causes">https://en.wikipedia.org/wiki/Hepatitis#Causes</a>                             | 33            | 26       | 4        | 63          |
| K74.3 Primary biliary cirrhosis                         | Primary biliary cholangitis    | <a href="https://en.wikipedia.org/wiki/Primary_biliary_cholangitis">https://en.wikipedia.org/wiki/Primary_biliary_cholangitis</a>       | 33            | 24       | 3        | 60          |
| K75.0 Abscess of liver                                  | Liver abscess                  | <a href="https://en.wikipedia.org/wiki/Liver_abscess">https://en.wikipedia.org/wiki/Liver_abscess</a>                                   | 21            | 9        | 2        | 32          |
| K75.4 Autoimmune hepatitis                              | Autoimmune hepatitis           | <a href="https://en.wikipedia.org/wiki/Autoimmune_hepatitis">https://en.wikipedia.org/wiki/Autoimmune_hepatitis</a>                     | 25            | 10       | 2        | 37          |
| K76.0 Fatty (change of) liver, not elsewhere classified | Fatty liver disease            | <a href="https://en.wikipedia.org/wiki/Fatty_liver_disease">https://en.wikipedia.org/wiki/Fatty_liver_disease</a>                       | 30            | 16       | 3        | 49          |
| K76.1 Chronic passive congestion of liver               | Congestive hepatopathy         | <a href="https://en.wikipedia.org/wiki/Congestive_hepatopathy">https://en.wikipedia.org/wiki/Congestive_hepatopathy</a>                 | 25            | 8        | 2        | 35          |
| K76.4 Peliosis hepatis                                  | Peliosis hepatis               | <a href="https://en.wikipedia.org/wiki/Peliosis_hepatis">https://en.wikipedia.org/wiki/Peliosis_hepatis</a>                             | 26            | 9        | 2        | 37          |
| K76.5 Hepatic veno-occlusive disease                    | Hepatic veno-occlusive disease | <a href="https://en.wikipedia.org/wiki/Hepatic_veno-occlusive_disease">https://en.wikipedia.org/wiki/Hepatic_veno-occlusive_disease</a> | 27            | 11       | 2        | 40          |
| K76.6 Portal hypertension                               | Portal hypertension            | <a href="https://en.wikipedia.org/wiki/Portal_hypertension">https://en.wikipedia.org/wiki/Portal_hypertension</a>                       | 28            | 21       | 3        | 52          |
| K76.7 Hepatorenal syndrome                              | Hepatorenal syndrome           | <a href="https://en.wikipedia.org/wiki/Hepatorenal_syndrome">https://en.wikipedia.org/wiki/Hepatorenal_syndrome</a>                     | 29            | 23       | 4        | 56          |
| K76.9 Liver disease, unspecified                        | Liver disease                  | <a href="https://en.wikipedia.org/wiki/Liver_disease">https://en.wikipedia.org/wiki/Liver_disease</a>                                   | 26            | 10       | 3        | 39          |
